# Supplementary material
Source: ML conference proceedings conference paper supplement (https://openaccess.thecvf.com/content/ICCV2023/html/Sevastopolskiy_How_to_Boost_ICCV_2023_paper.html)
Supplement: Supplementary file 1 [file Sevastopolskiy_How_to_Boost_ICCV_2023_supplemental.zip]

Archive with 2 entries (2 files):
- Final_Supplementary_ICCV_2023__How_to_boost_facerec_with_StyleGAN.mp4
- Final_Supplementary_ICCV_2023__How_to_boost_facerec_with_StyleGAN.pdf
